# Supplementary material for: Antioxidant and Antimelanogenic Activities of Lactobacillus kunkeei NCHBL-003 Isolated from Honeybees
Source: MDPI journal article supplement (doi:10.3390/microorganisms12010188), 2024-01-17
Supplement: s1 [file s1]

**Supplementary Table S1.** Primer (human) sequences for real time PCR

| <b>Primer</b> | <b>Direction</b> | <b>Sequences (5' to 3')</b>  |
|---------------|------------------|------------------------------|
| HO-1          | Forward          | GGAGGAGATTGAGCGCAACA         |
|               | Reverse          | CCAGACAGGTCACCCAGGTA         |
| Nrf2          | Forward          | TGATTGACATACTTTGGAGGCAAGA    |
|               | Reverse          | CGACTTCAACAGCAACTCCCACTCTTCC |
| GAPDH         | Forward          | CGACTTCAACAGCAACTCCCACTCTTCC |
|               | Reverse          | TGGGTGGTCCAGGGTTTCTTACTCCTT  |

**Supplementary Table S2.** Primer (mouse) sequences for real time PCR

| <b>Primer</b> | <b>Primer</b> | <b>Sequences</b>     |
|---------------|---------------|----------------------|
| TYR           | Forward       | TGCACCTATCGGCCATAACA |
|               | Reverse       | ATACGACTGGCCTTGTTCCA |
| Mitf          | Forward       | TCTGAAGCAAGAGCATTGGC |
|               | Reverse       | CCGGATGTAGTCCACAGAGG |
| Tyrp-1        | Forward       | CTGGGAAAAACGTCTGCGAT |
|               | Reverse       | CTGATTGGTCCACCCTCAGT |
| Tyrp-2        | Forward       | TGGCTACAATTACGCCGTTG |
|               | Reverse       | CCCCAAGAGCAAGACGAAAG |
| GAPDH         | Forward       | AACTTTGGCATTGTGGAAGG |
|               | Reverse       | ACACATTGGGGGTAGGAACA |
